# Supplementary material for: Underground leaves ofPhilcoxiatrap and digest nematodes
Source: HighWire-hosted journal article supplement (doi:10.1073/pnas.1114199109), 2012-01-09
Supplement: pnas.201114199SI.pdf [file pnas.201114199SI.pdf]

# Supporting Information

Pereira et al. 10.1073/pnas.1114199109

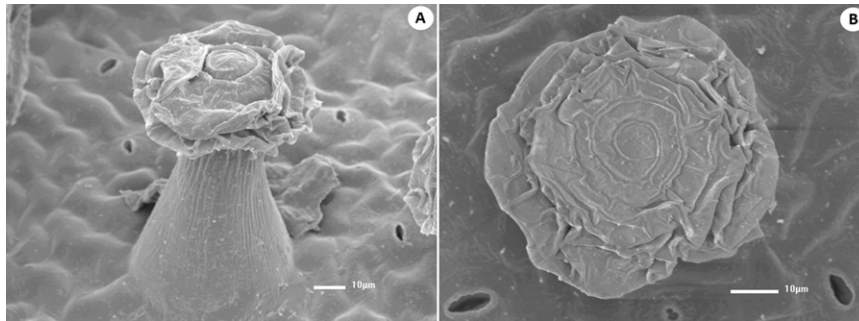

Fig. S1. Scanning EM image of stalked glands of *Philcoxia minensis* leaves. (A) Oblique view of a single gland. (B) Apical view of another gland.
